# Supplementary material for: Meaningful changes in end-of-life care among patients with myeloma
Source: PubMed Central journal article supplement — Haematologica. 2018 May 10;103(8):1380–9. doi: 10.3324/haematol.2018.187609 (PMC6068022; doi:10.3324/haematol.2018.187609), 2018-08
Supplement: 2018_187609-Disclosures_and_Contributions.pdf [file 2018_187609-Disclosures_and_Contributions.pdf]

Haematologica  
HAEMATOL/2018/187609  
Version 3

Meaningful changes in end-of-life care among patients with myeloma

Oreofe O. Odejide, Ling Li, Angel M. Cronin, Anays Murillo, Paul G. Richardson, Kenneth C. Anderson, and Gregory A. Abel

Disclosures: No conflicts of interest

Contributions: OO, AC, AM, and GA performed research, OO, LL, and AC performed data analysis, all authors performed interpretation of data, all authors wrote the manuscript, and GA supervised the study.
